# Supplementary material for: Gender differences and lung cancer risk in occupational chefs: analyzing more than 350,000 chefs in Taiwan, 1984–2011
Source: PubMed Central journal article supplement (PMC6323082; doi:10.1007/s00420-018-1358-8), 2018-09-18
Supplement: 420_2018_1358_MOESM1_ESM.pdf [file 420_2018_1358_MOESM1_ESM.pdf]

## Tables

**eTable 1. STROBE Statement—checklist of items regarding whether they were included in this observational study.**

|                          | Item No | Recommendation                                                                                                                                                                                                                                                                                                                                                                                                                                                         | Checklist |
|--------------------------|---------|------------------------------------------------------------------------------------------------------------------------------------------------------------------------------------------------------------------------------------------------------------------------------------------------------------------------------------------------------------------------------------------------------------------------------------------------------------------------|-----------|
| Title and abstract       | 1       | (a) Indicate the study's design with a commonly used term in the title or the abstract                                                                                                                                                                                                                                                                                                                                                                                 | Yes       |
|                          |         | (b) Provide in the abstract an informative and balanced summary of what was done and what was found                                                                                                                                                                                                                                                                                                                                                                    | Yes       |
| <b>Introduction</b>      |         |                                                                                                                                                                                                                                                                                                                                                                                                                                                                        |           |
| Background/rationale     | 2       | Explain the scientific background and rationale for the investigation being reported                                                                                                                                                                                                                                                                                                                                                                                   | Yes       |
| Objectives               | 3       | State specific objectives, including any prespecified hypotheses                                                                                                                                                                                                                                                                                                                                                                                                       | Yes       |
| <b>Methods</b>           |         |                                                                                                                                                                                                                                                                                                                                                                                                                                                                        |           |
| Study design             | 4       | Present key elements of study design early in the paper                                                                                                                                                                                                                                                                                                                                                                                                                | Yes       |
| Setting                  | 5       | Describe the setting, locations, and relevant dates, including periods of recruitment, exposure, follow-up, and data collection                                                                                                                                                                                                                                                                                                                                        | Yes       |
| Participants             | 6       | (a) <i>Cohort study</i> —Give the eligibility criteria, and the sources and methods of selection of participants. Describe methods of follow-up<br><i>Case-control study</i> —Give the eligibility criteria, and the sources and methods of case ascertainment and control selection. Give the rationale for the choice of cases and controls<br><i>Cross-sectional study</i> —Give the eligibility criteria, and the sources and methods of selection of participants | Yes       |
|                          |         | (b) <i>Cohort study</i> —For matched studies, give matching criteria and number of exposed and unexposed<br><i>Case-control study</i> —For matched studies, give matching criteria and the number of controls per case                                                                                                                                                                                                                                                 | N/A       |
| Variables                | 7       | Clearly define all outcomes, exposures, predictors, potential confounders, and effect modifiers. Give diagnostic criteria, if applicable                                                                                                                                                                                                                                                                                                                               | Yes       |
| Data sources/measurement | 8*      | For each variable of interest, give sources of data and details of methods of assessment (measurement). Describe comparability of assessment methods if there is more than one group                                                                                                                                                                                                                                                                                   | Yes       |
| Bias                     | 9       | Describe any efforts to address potential sources of bias                                                                                                                                                                                                                                                                                                                                                                                                              | N/A       |
| Study size               | 10      | Explain how the study size was arrived at                                                                                                                                                                                                                                                                                                                                                                                                                              | Yes       |
| Quantitative variables   | 11      | Explain how quantitative variables were handled in the analyses. If applicable, describe which groupings were chosen and why                                                                                                                                                                                                                                                                                                                                           | Yes       |
| Statistical methods      | 12      | (a) Describe all statistical methods, including those used to control for confounding                                                                                                                                                                                                                                                                                                                                                                                  | Yes       |
|                          |         | (b) Describe any methods used to examine subgroups and interactions                                                                                                                                                                                                                                                                                                                                                                                                    | Yes       |
|                          |         | (c) Explain how missing data were addressed                                                                                                                                                                                                                                                                                                                                                                                                                            | N/A       |
|                          |         | (d) <i>Cohort study</i> —If applicable, explain how loss to follow-up was addressed<br><i>Case-control study</i> —If applicable, explain how matching of cases and controls was addressed<br><i>Cross-sectional study</i> —If applicable, describe analytical methods taking account of sampling strategy                                                                                                                                                              | N/A       |
|                          |         | (e) Describe any sensitivity analyses                                                                                                                                                                                                                                                                                                                                                                                                                                  | N/A       |
| <b>Results</b>           |         |                                                                                                                                                                                                                                                                                                                                                                                                                                                                        |           |
| Participants             | 13*     | (a) Report numbers of individuals at each stage of study—eg numbers potentially eligible, examined for eligibility, confirmed eligible, included in the study, completing follow-up, and analysed                                                                                                                                                                                                                                                                      | Yes       |
|                          |         | (b) Give reasons for non-participation at each stage                                                                                                                                                                                                                                                                                                                                                                                                                   | Yes       |
|                          |         | (c) Consider use of a flow diagram                                                                                                                                                                                                                                                                                                                                                                                                                                     | Yes       |
| Descriptive data         | 14*     | (a) Give characteristics of study participants (eg demographic, clinical, social) and information on exposures and potential confounders                                                                                                                                                                                                                                                                                                                               | Yes       |
|                          |         | (b) Indicate number of participants with missing data for each variable of interest                                                                                                                                                                                                                                                                                                                                                                                    | Yes       |
|                          |         | (c) <i>Cohort study</i> —Summarise follow-up time (eg, average and total amount)                                                                                                                                                                                                                                                                                                                                                                                       | Yes       |
| Outcome data             | 15*     | <i>Cohort study</i> —Report numbers of outcome events or summary measures over time                                                                                                                                                                                                                                                                                                                                                                                    | Yes       |
|                          |         | <i>Case-control study</i> —Report numbers in each exposure category, or summary measures of exposure                                                                                                                                                                                                                                                                                                                                                                   | N/A       |
|                          |         | <i>Cross-sectional study</i> —Report numbers of outcome events or summary measures                                                                                                                                                                                                                                                                                                                                                                                     | N/A       |

|                          |    |                                                                                                                                                                                                              |     |
|--------------------------|----|--------------------------------------------------------------------------------------------------------------------------------------------------------------------------------------------------------------|-----|
| Main results             | 16 | (a) Give unadjusted estimates and, if applicable, confounder-adjusted estimates and their precision (eg, 95% confidence interval). Make clear which confounders were adjusted for and why they were included | Yes |
|                          |    | (b) Report category boundaries when continuous variables were categorized                                                                                                                                    | Yes |
|                          |    | (c) If relevant, consider translating estimates of relative risk into absolute risk for a meaningful time period                                                                                             | Yes |
| Other analyses           | 17 | Report other analyses done—eg analyses of subgroups and interactions, and sensitivity analyses                                                                                                               | Yes |
| <b>Discussion</b>        |    |                                                                                                                                                                                                              |     |
| Key results              | 18 | Summarise key results with reference to study objectives                                                                                                                                                     | Yes |
| Limitations              | 19 | Discuss limitations of the study, taking into account sources of potential bias or imprecision. Discuss both direction and magnitude of any potential bias                                                   | Yes |
| Interpretation           | 20 | Give a cautious overall interpretation of results considering objectives, limitations, multiplicity of analyses, results from similar studies, and other relevant evidence                                   | Yes |
| Generalisability         | 21 | Discuss the generalisability (external validity) of the study results                                                                                                                                        | N/A |
| <b>Other information</b> |    |                                                                                                                                                                                                              |     |
| Funding                  | 22 | Give the source of funding and the role of the funders for the present study and, if applicable, for the original study on which the present article is based                                                | Yes |

**eTable 2. Lung cancer categorized by histological subtypes (ICD-9-CM: 162).**

| <b>Histological Type</b>                       | <b>Group code<sup>1</sup></b> | <b>Histological type</b> |
|------------------------------------------------|-------------------------------|--------------------------|
| Small cell carcinoma                           | 1                             | 8041                     |
| Combined cell carcinoma                        | 1                             | 8045                     |
| Adenocarcinoma                                 | 2                             | 8140                     |
| Bronchioloalveolar carcinoma                   | 2                             | 8250                     |
| Adenoid alveolar adenocarcinoma                | 2                             | 8251                     |
| Adenocarcinoma, mixed subtype                  | 2                             | 8255                     |
| Papillary adenocarcinoma                       | 2                             | 8260                     |
| Mucinous (“colloid”) carcinoma                 | 2                             | 8480                     |
| Squamous cell carcinoma                        | 3                             | 8070                     |
| Keratinizing squamous cell carcinoma           | 3                             | 8071                     |
| Nonkeratinizing squamous cell carcinoma        | 3                             | 8072                     |
| Large cell carcinoma                           | 4                             | 8012                     |
| Pleomorphic carcinoma                          | 4                             | 8022                     |
| Sarcomatoid carcinoma                          | 4                             | 8033                     |
| Bronchioloalveolar nonmucinous carcinoma       | 4                             | 8252                     |
| Mucoepidermoid carcinoma                       | 4                             | 8430                     |
| Acinar adenocarcinoma                          | 4                             | 8550                     |
| Adenosquamous carcinoma                        | 4                             | 8560                     |
| Spindle cell sarcom                            | 4                             | 8801                     |
| Pulmonary blastoma                             | 4                             | 8972                     |
| Marginal zone B-cell lymphoma of the MALT type | 4                             | 9699                     |
| Carcinoma                                      | 4                             | 8000                     |
| Unspecified malignant neoplasm                 | 4                             | 8010                     |

<sup>1</sup>Group code: 1 indicates small cell; 2 indicates non-small cell and adenocarcinoma; 3 indicates non-small cell and squamous cell carcinoma; 4 indicates non-small cell and others.

References from <https://www.iarc.fr/en/publications/pdfs-online/epi/sp160/CI5vol9-4.pdf> and <https://www.iarc.fr/en/publications/pdfs-online/pat-gen/bb10/bb10-chap1.pdf>

**eTable 3. Incidence risk ratio (IRR) of lung squamous cell carcinoma (LSCC) in total and by gender.**

|                                             |     |                              | LSCC |                             |                                   |                                          |
|---------------------------------------------|-----|------------------------------|------|-----------------------------|-----------------------------------|------------------------------------------|
|                                             |     | Person year<br>at risk (yrs) | Case | IR/10 <sup>5</sup><br>(yrs) | Crude<br>IRR<br>(95% CI)          | Adjusted <sup>1</sup><br>IRR<br>(95% CI) |
| <b>Total</b>                                |     |                              |      |                             |                                   |                                          |
| <b>Non-Chinese food chefs</b>               |     | 544,690                      | 5    | 0.92                        | 1.00                              | 1.00                                     |
| <b>Chinese food chefs</b>                   |     | 3,675,473                    | 28   | 0.76                        | 0.83<br>(0.32-2.15)               | 0.55<br>(0.21-1.46)                      |
| <b>Years of<br/>certification<br/>(yrs)</b> | ≤ 5 | 1,656,756                    | 2    | 0.12                        | <b>0.13</b><br><b>(0.03-0.68)</b> | <b>0.09</b><br><b>(0.02-0.46)</b>        |
|                                             | > 5 | 2,018,717                    | 26   | 1.29                        | 1.40<br>(0.54-3.65)               | 0.92<br>(0.34-2.48)                      |
| <b>Female</b>                               |     |                              |      |                             |                                   |                                          |
| <b>Non-Chinese food chefs</b>               |     | 311,439                      | 1    | 0.32                        | 1.00                              | 1.00                                     |
| <b>Chinese food chefs</b>                   |     | 2,571,411                    | 10   | 0.39                        | 1.21<br>(0.16-9.46)               | 0.41<br>(0.05-3.40)                      |
| <b>Years of<br/>certification<br/>(yrs)</b> | ≤ 5 | 1,159,275                    | 1    | 0.09                        | 0.27<br>(0.02-4.30)               | 0.09<br>(0.01-1.51)                      |
|                                             | > 5 | 1,412,136                    | 9    | 0.64                        | 1.99<br>(0.25-15.67)              | 0.67<br>(0.08-5.66)                      |
| <b>Male</b>                                 |     |                              |      |                             |                                   |                                          |
| <b>Non-Chinese food chefs</b>               |     | 233,252                      | 4    | 1.71                        | 1.00                              | 1.00                                     |
| <b>Chinese food chefs</b>                   |     | 1,104,062                    | 18   | 1.63                        | 0.95<br>(0.32-2.81)               | 0.59<br>(0.19-1.77)                      |
| <b>Years of<br/>certification<br/>(yrs)</b> | ≤ 5 | 497,481                      | 1    | 0.20                        | 0.12<br>(0.01-1.05)               | <b>0.07</b><br><b>(0.01-0.66)</b>        |
|                                             | > 5 | 606,581                      | 17   | 2.80                        | 1.63<br>(0.55-4.86)               | 1.00<br>(0.33-3.05)                      |

<sup>1</sup>Adjusting for age range (15-39, 40-59 and ≥ 60 years old) and gender.
